# Supplementary material for: LEF1 reduces tumor progression and induces myodifferentiation in a subset of rhabdomyosarcoma
Source: PubMed Central journal article supplement (PMC5356880; doi:10.18632/oncotarget.13887), 2016-12-10
Supplement: oncotarget-08-3259-s001.pdf [file oncotarget-08-3259-s001.pdf]

## LEF1 reduces tumor progression and induces myodifferentiation in a subset of rhabdomyosarcoma

### Supplementary Materials

**Supplementary Table S1: The expression of *LEF1* and *CTNNB1* was evaluated in a publicly available RMS microarray data set [1]**

|                                                                 | LEF1  | CTNNB1 |
|-----------------------------------------------------------------|-------|--------|
| ARMS (P3F) ( <i>n</i> = 38) vs.<br>ERMS ( <i>n</i> = 75)        | 0.732 | 0.947  |
| ARMS (P3F) ( <i>n</i> = 38) vs.<br>ERMS (w.d.) ( <i>n</i> = 21) | 0.360 | 0.715  |
| ARMS (P3F) ( <i>n</i> = 38) vs.<br>ERMS (m.d.) ( <i>n</i> = 33) | 0.997 | 0.499  |
| ARMS (P3F) ( <i>n</i> = 38) vs.<br>ERMS (u.d.) ( <i>n</i> = 21) | 0.986 | 0.176  |

Shown are the adjusted *P*-values of the comparison of *LEF1* and *CTNNB1* expression in RMS subgroups. P3F: PAX3-FOXO1-fusion positive; w.d. well differentiated; m.d. moderately differentiated; u.d. undifferentiated.

**Supplementary Table S2: Primary and secondary antibodies used for immunohistochemical analyses**

| <b>Antibody</b>                                               | <b>Product and company</b>               | <b>Dilution</b>           |
|---------------------------------------------------------------|------------------------------------------|---------------------------|
| <b>Primary antibody</b>                                       |                                          |                           |
| Mouse anti- $\beta$ -catenin                                  | pAB, 610153, BD Bioscience               | 1:250                     |
| Mouse anti- $\beta$ -catenin                                  | mAB, CAT-5H10, Zymed                     | 1:200                     |
| Mouse anti-HLA-A,B,C                                          | mAB, 311402, BioLegend                   | 1:100                     |
| Rabbit anti-LEF1                                              | mAB, EPR2029Y, Abgent                    | 1:250                     |
| <b>Secondary antibody</b>                                     |                                          |                           |
| Rhodamine (TRITC) Donkey anti-Mouse IgG (H+L)                 | pAB, 715-025-150, Jackson ImmunoResearch | 1:200                     |
| Alexa Fluor 594 Goat anti-Mouse IgG2a ( $\gamma$ 2a)          | pAB, A-21135, ThermoFisher               | 1:200                     |
| EnVision Detection Systems Peroxidase/DAB Rabbit/Mouse        | pAB, K4065, DAKO                         | Manufacturer instructions |
| <b>Primary and secondary antibodies used for Western blot</b> |                                          |                           |
| <b>Antibody</b>                                               | <b>Product and company</b>               | <b>Dilution</b>           |
| <b>Primary antibody</b>                                       |                                          |                           |
| Mouse anti- $\beta$ -catenin                                  | pAB, 610153, BD Bioscience               | 1:10000                   |
| Mouse anti-HSC-70                                             | mAB, sc-7298, Santa Cruz                 | 1:10000                   |
| Rabbit anti- $\beta$ -Actin                                   | mAB, 13E5, Cell Signaling                | 1:10000                   |
| Mouse anti- $\beta$ -Actin                                    | mAB, C4, Santa Cruz                      | 1:2000                    |
| Rabbit anti-LEF1                                              | mAB, EPR2029Y, Abgent                    | 1:20000                   |
| Rabbit anti-LEF1                                              | mAB, C18A7, Cell Signaling               | 1:1000                    |
| <b>Secondary antibody</b>                                     |                                          |                           |
| Goat anti-Rabbit/HRP                                          | pAB, A0545, Sigma-Aldrich                | 1:5000                    |
| Sheep anti-Mouse/HRP                                          | pAB, NA931, GE Healthcare                | 1:5000                    |

**Supplementary Table S3: Oligonucleotides used for qRT-PCR**

| Primer name  | Primer sequence (5' - 3' orientation) | Location   | Application                   |
|--------------|---------------------------------------|------------|-------------------------------|
| 18S_For      | CGCAAATTACCCACTCCCG                   | exon 1     | <i>18S</i><br>expression      |
| 18S_Rev      | TTCCAATTACAGGGCCTCGAA                 | exon 1     |                               |
| AXIN2_For    | GCCAACGACAGTGAGATATCC                 | exon 2     | <i>AXIN2</i><br>expression    |
| AXIN2_Rev    | CTCGAGATCAGCTCAGCTGCA                 | exon 4     |                               |
| CKM_For      | GGAACTCTTTGACCCCATCA                  | exon 3     | <i>CKM</i><br>expression      |
| CKM_Rev      | CTCCACCCTTGAGGTTTTCA                  | exon 3/4   |                               |
| CTNNB_For    | GAAACGGCTTTCAGTTGAGC                  | exon 8     | <i>CTNNB1</i><br>expression   |
| CTNNB_Rev    | CTGGCCATATCCACCAGAGT                  | exon 9/10  |                               |
| c-MYC_For    | GTGCTCCATGAGGAGACA                    | exon 2     | <i>c-MYC</i><br>expression    |
| c-MYC_Rev    | AGCCTGCCTCTTTTCCA                     | exon 3     |                               |
| DESMIN_For   | TGAAGGGCACTAACGATTCC                  | exon 5/6   | <i>DESMIN</i><br>expression   |
| DESMIN_Rev   | TGTTGTCTGGTAGCCACTG                   | exon 6     |                               |
| GAPDH_For    | TGCACCACCAACTGCTTAGC                  | exon 5     | <i>GAPDH</i><br>expression    |
| GAPDH_Rev    | GGCATGGACTGTGGTCATGAG                 | exon 5/6   |                               |
| LEF1_For     | CGGGTACATAATGATGCCAA                  | exon 3     | <i>LEF1</i><br>expression     |
| LEF1_Rev     | CGTCACTGTAAGTGATGAGGG                 | exon 4     |                               |
| MYH1_For     | TGTGCAGCAGGTGTACAATGC                 | exon 13/14 | <i>MYH1</i><br>expression     |
| MYH1_Rev     | TGCACAGCTGCTCCAGGCT                   | exon 15    |                               |
| MYOD_For     | CGAACCCCAACCCGATA                     | exon 3     | <i>MYOD</i><br>expression     |
| MYOD_Rev     | GAAAAAACC GCGCTGTGT                   | exon 3     |                               |
| MYOGENIN_For | AGCGAATGCAGCTCTCACAG                  | exon 2     | <i>MYOGENIN</i><br>expression |
| MYOGENIN_Rev | AGGTTGTGGGCATCTGTAGG                  | exon 4     |                               |
| TCF1_For     | GCAACCTGAAGACACAAGCA                  | exon 4/5   | <i>TCF1</i><br>expression     |
| TCF1_Rev     | GCAATGACCTTGGCTCTCAT                  | exon 5     |                               |
| TCF3_For     | GAGTCGGAGAACCAGAGCAG                  | exon 1     | <i>TCF3</i><br>expression     |
| TCF3_Rev     | CTGTCTGAGGCCTTCTCAC                   | exon 2/3   |                               |
| TCF4_For     | ATGCTTCCATGTCCAGGTTC                  | exon 8/9   | <i>TCF4</i><br>expression     |
| TCF4_Rev     | CACTCTGGGACGATTCTGT                   | exon 9     |                               |

**Supplementary Table S4: Oligonucleotides used for *CTNNB1* sequencing**

| Primer name  | Primer sequence (5' - 3' orientation) | Position  | Product size |
|--------------|---------------------------------------|-----------|--------------|
| CTNNB_Sq_1F  | ACAGGTATCCCAGTGA CTTAGG               | -124 bp   | 182 bp       |
| CTNNB_Sq_1R  | GAAGCAGAGCCCCAATTCAG                  | intron 1  |              |
| CTNNB_Sq_F2  | TCTGCTTTTCTTGGCTGTCT                  | intron 1  | 474 bp       |
| CTNNB_Sq_R2  | ACTCTCTTTTCTTCACCACAACA               | intron 2  |              |
| CTNNB_Sq_F3  | TGCTGAACTGTGGATAGTGAGT                | intron 2  | 659 bp       |
| CTNNB_Sq_R3  | AAGCATTTTCACCAGGGCAG                  | intron 4  |              |
| CTNNB_Sq_F4  | CTGCCCTGGTGAAAATGCTT                  | intron 4  | 358 bp       |
| CTNNB_Sq_R4  | AGGTGTCCAATGCTCCATGA                  | intron 5  |              |
| CTNNB_Sq_F5  | TTAGGTCCAATGGCAAGCTG                  | intron 5  | 392 bp       |
| CTNNB_Sq_R5  | GGCTGCAA ACTGAATAGGACC                | intron 6  |              |
| CTNNB_Sq_F6  | ACTTCTAGCTAATGACTAGGGCC               | intron 6  | 716 bp       |
| CTNNB_Sq_R6  | TACCCCTATCGCAGCCATAC                  | intron 8  |              |
| CTNNB_Sq_F7  | GTATGGCTGCGATAGGGGTA                  | intron 8  | 416 bp       |
| CTNNB_Sq_R7  | TTCAGGAAGACGGATGGGG                   | intron 9  |              |
| CTNNB_Sq_F8  | GTTACGGGGAACTTCGGGTA                  | intron 9  | 403 bp       |
| CTNNB_Sq_R8  | CCTCCCTCTTCTCAAGTCTCA                 | intron 10 |              |
| CTNNB_Sq_F9  | TTGGGAATGTTTGCACCACA                  | intron 10 | 558 bp       |
| CTNNB_Sq_R9  | GCCAGGGAAACATCAATGCA                  | intron 12 |              |
| CTNNB_Sq_F10 | TGAGGTGTGGAGTTTTGAAGA                 | intron 12 | 415 bp       |
| CTNNB_Sq_R10 | TGTGTGGCTCTGAATCCCT                   | intron 13 |              |
| CTNNB_Sq_F11 | GGATGCCCTAACCTCAGTGT                  | intron 13 | 401 bp       |
| CTNNB_Sq_R11 | CCACCCTACCAACCAAGTCT                  | 3' UTR    |              |

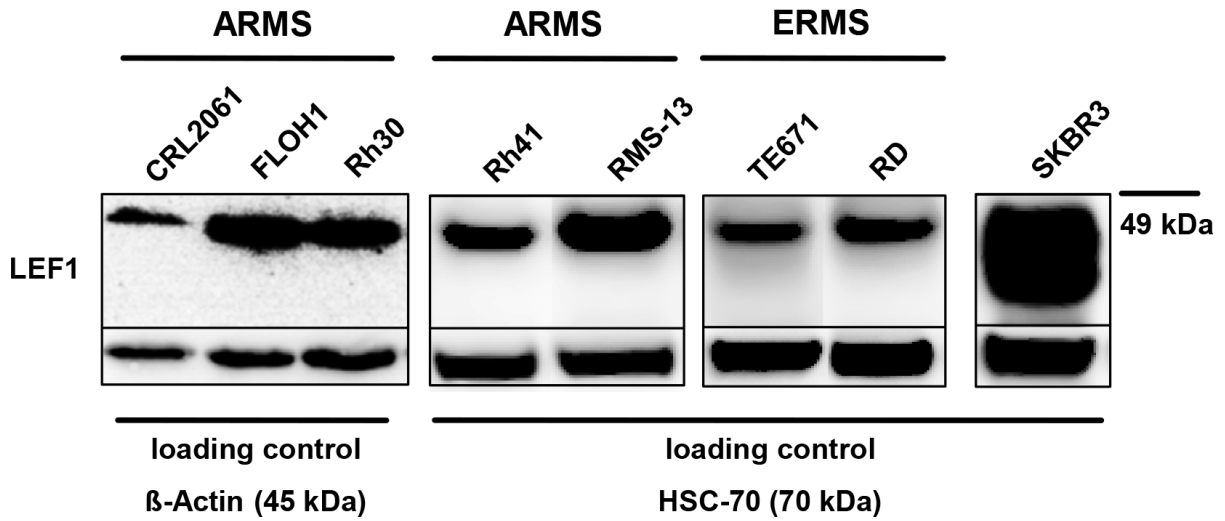

Supplementary Figure S1: LEF1 protein levels analyzed by Western Blot in the ARMS cell lines CRL2061, FLOH1, Rh30, Rh41 and RMS-13 and in the ERMS cell lines TE671 and RD. The cell line SKBR3 served as a positive control.  $\beta$ -Actin or HSC-70 protein levels served as loading control.

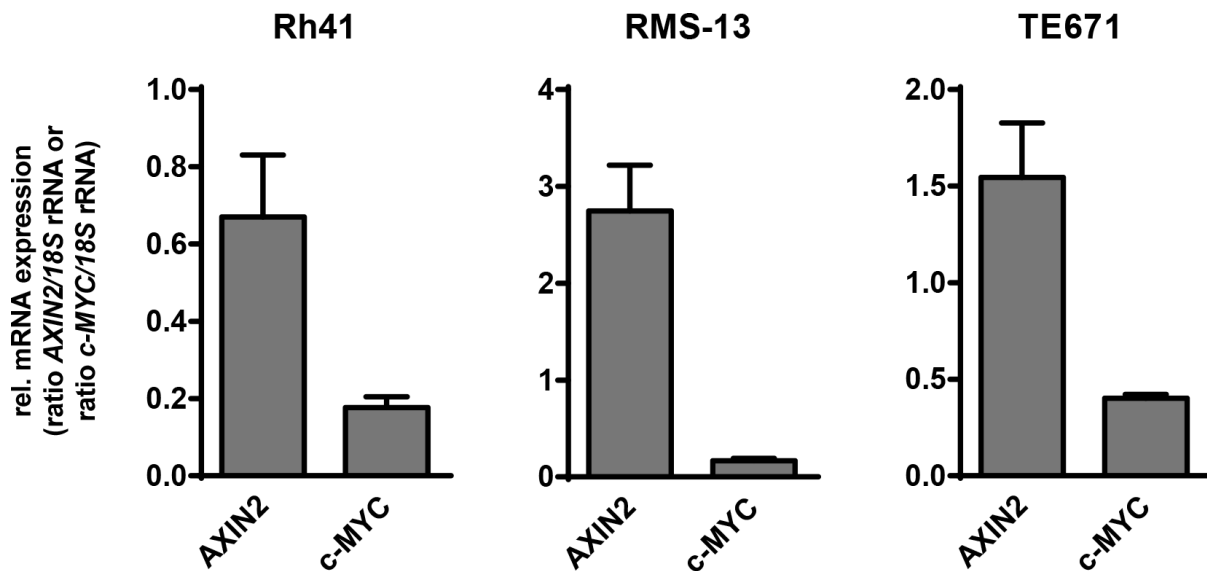

Supplementary Figure S2: *AXIN2* and *c-MYC* expression levels analyzed by qRT-PCR in Rh41, RMS-13 and TE671 wildtype cells. Gene expression levels were normalized to *18S* rRNA expression levels. All data represent mean+SEM of three independent experiments performed in duplicates and measured in triplicates.

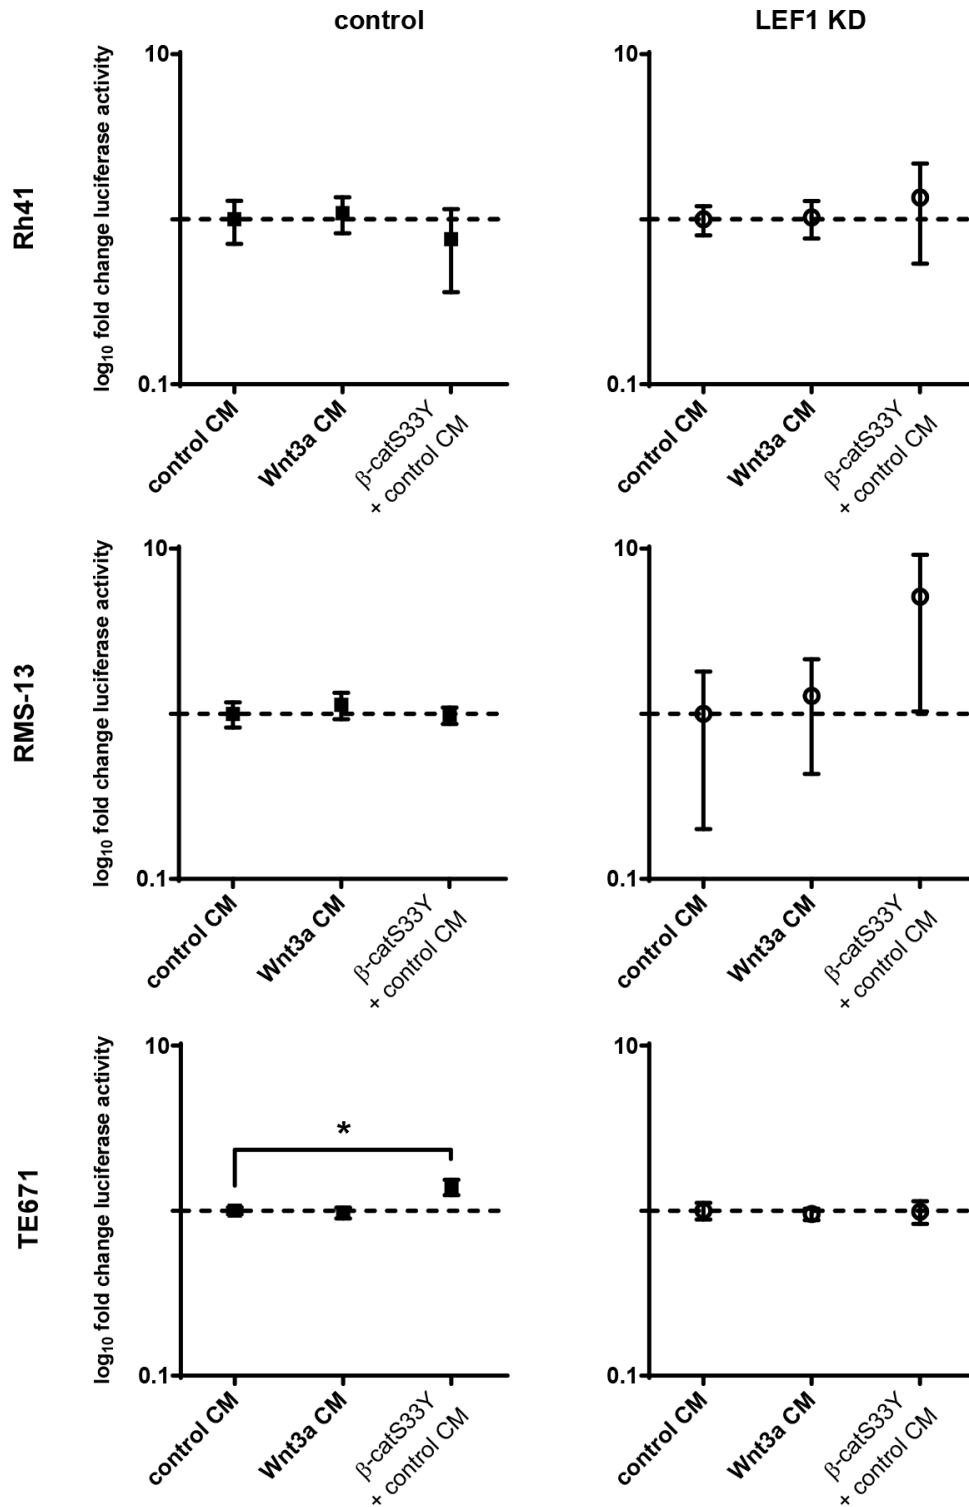

**Supplementary Figure S3: The stable RMS LEF1 KD and respective control cells were transfected with the *SuperFOPFlash* (FOP) plasmid along with *Renilla* reporter plasmid for normalization.** The FOP assay was performed in the presence of Wnt3a conditioned medium (Wnt3a CM) that activate canonical WNT signaling, or in the presence of control medium (control CM) or after transfection with pCl-neo-β-catS33Y plasmid that expresses an activated β-catenin. The value after incubation with control CM was set to 1. As demonstrated, with the exception of pCl-neo-β-catS33Y-transfected TE671 cells ( $P = 0.041$ ), all other settings had no effect on luciferase activity in FOP-transfected RMS cell lines.

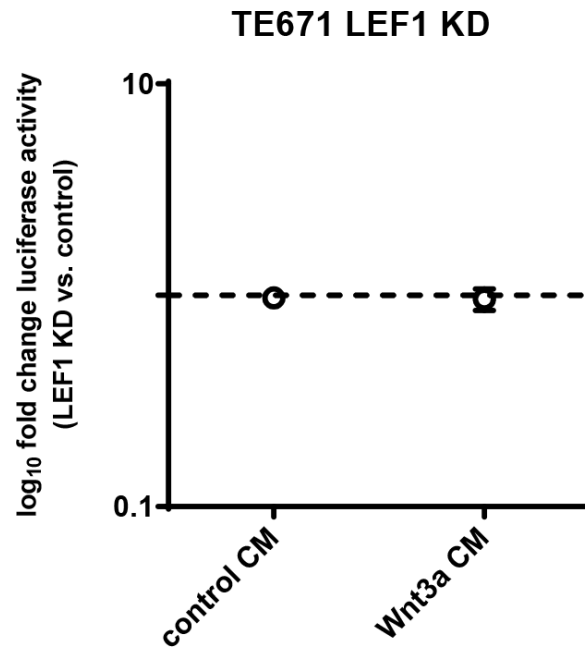

**Supplementary Figure S4:** As stated in the main manuscript, both TE671 control and TE671 LEF1 KD cells showed a more than 10-fold induction of TOP activity after Wnt3a CM treatment (Figure 3B). In order to evaluate to what extent the LEF1 KD influences Wnt3a-mediated TOP induction, the values from the TOP assay of TE671 LEF1 KD cells were normalized to that of TE671 control cells (that were set to 1). As shown below, the LEF1 KD in TE671 did not influence reporter activity when compared to control-transduced cells i.e. we did not see any increase or decrease in luciferase activity that could be ascribed to the LEF1 KD.

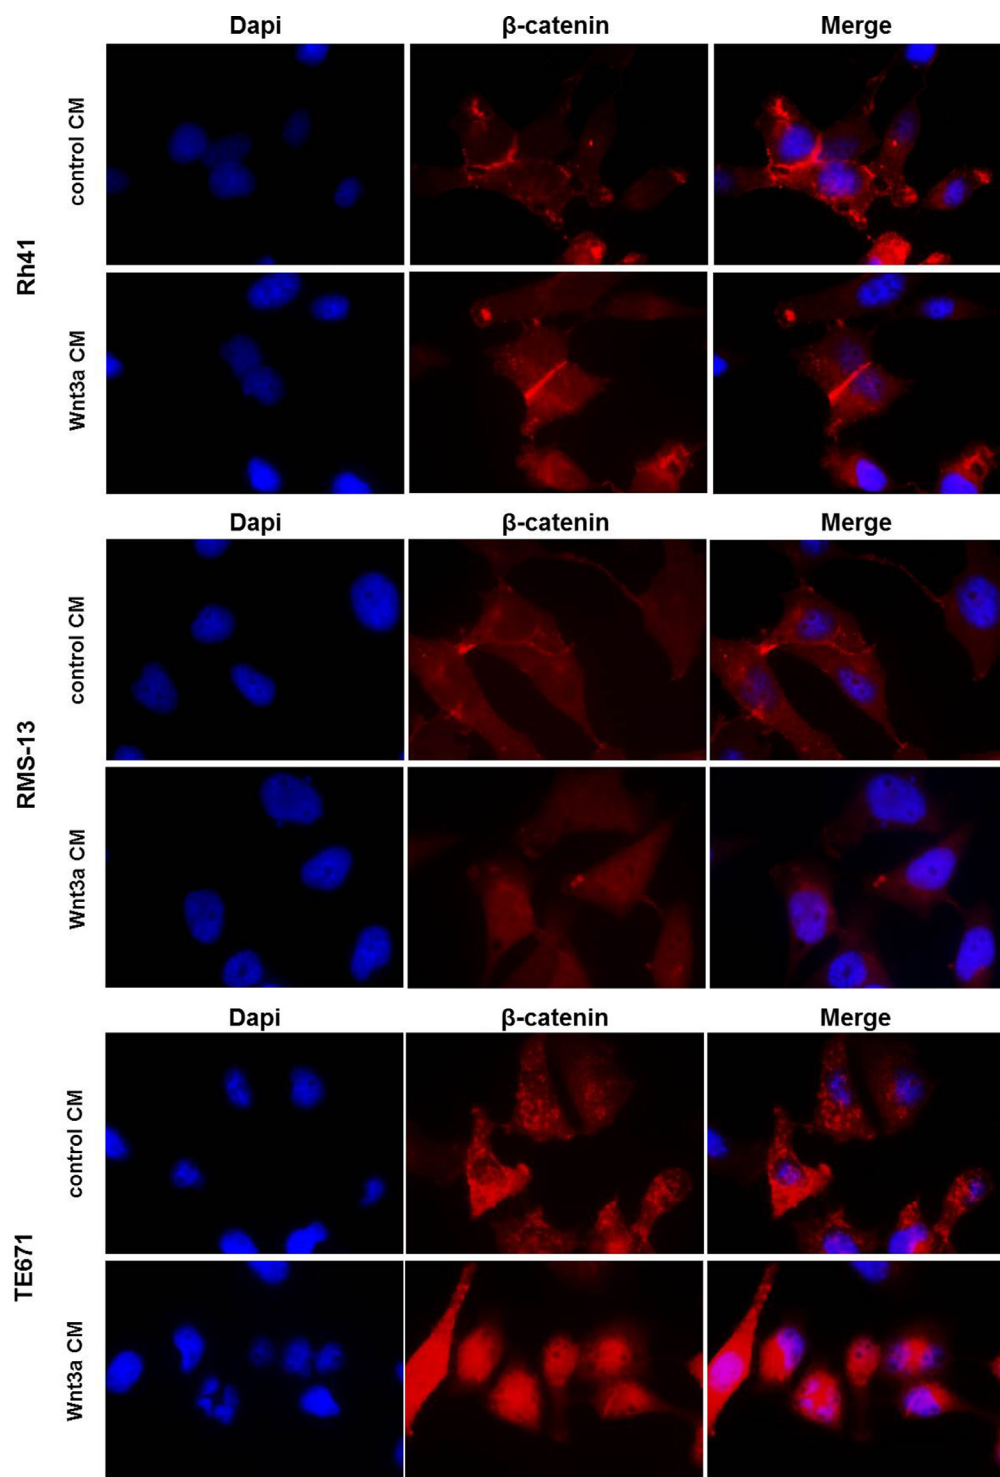

**Supplementary Figure S5: Localization of  $\beta$ -catenin in Rh41, RMS-13 and TE671 control transduced cell lines cultured in control or Wnt3a CM for 3 h as analyzed by immunofluorescence (60-fold magnification).** Approximately 10% of Wnt3a-treated Rh41 cells showed weak nuclear signals, but none of Wnt3a-treated RMS-13 cells. In TE671 cells, staining revealed a predominant nuclear localization of  $\beta$ -catenin after Wnt3a stimulation. DAPI was used to stain cell nuclei (blue).



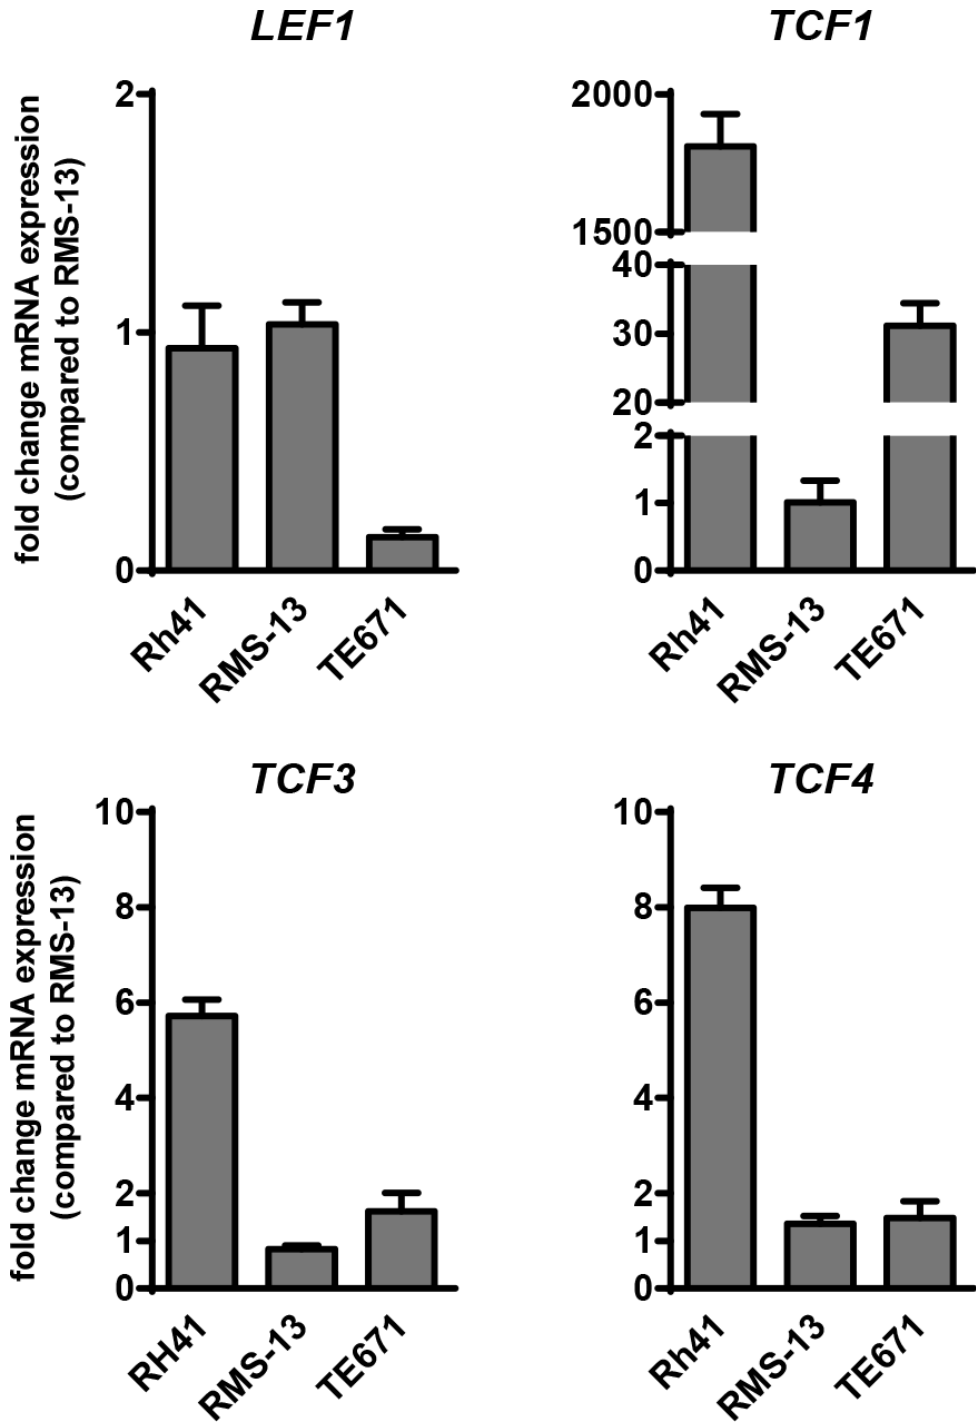

Supplementary Figure S6: Expression of *LEF1*, *TCF1*, *TCF3* and *TCF4* in Rh41, RMS-13 and TE671 are shown as fold change expression in relation to RMS-13 cells. Gene expression levels were normalized to *GAPDH* expression levels. Data represent mean + SEM of at least four independent experiments measured in duplicates. Please note that the expression level of one of the independent measurements of RMS-13 cDNA was set to 1.

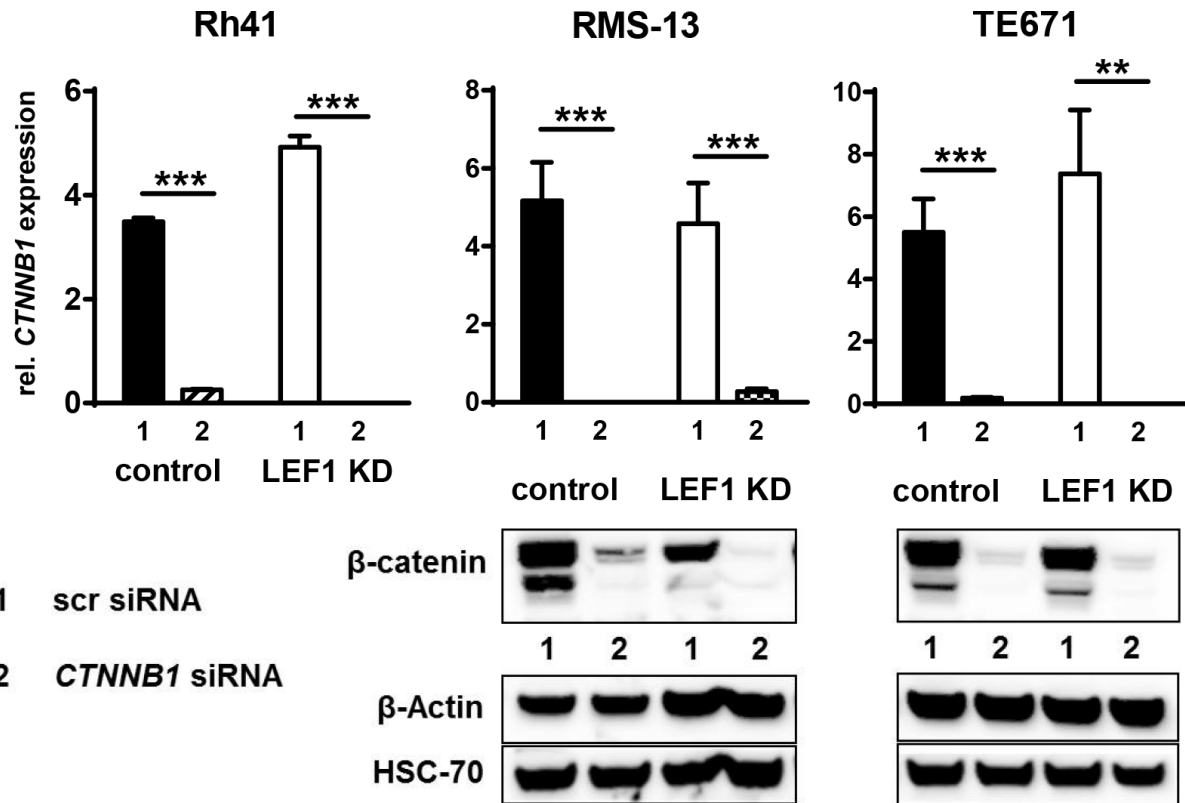

**Supplementary Figure S7: qRT-PCR and Western blot analysis of  $\beta$ -catenin in Rh41, RMS-13 and TE671 control and the respective LEF1 KD cells performed 72 h (qRT-PCR) and 96 h (Western blot) after transfection with scrambled (scr) siRNA (1) or *CTNNB1* siRNA (2). qRT-PCR (upper panel) data represent two independent experiments performed in duplicates and measured in triplicates. Gene expression levels were normalized to *18S* rRNA and data are displayed as mean+SEM; \*\* $P < 0.01$ , \*\*\* $P < 0.001$  by Students *t*-test. For Western blot (lower panel) analysis was done for RMS-13 and TE671 cells. HSC-70 and  $\beta$ -Actin served as loading control.**

## REFERENCES

1. Davicioni E, Anderson MJ, Finckenstein FG, Lynch JC, Qualman SJ, Shimada H, Schofield DE, Buckley JD, Meyer WH, Sorensen PH, Triche TJ. Molecular

classification of rhabdomyosarcoma—genotypic and phenotypic determinants of diagnosis: a report from the Children's Oncology Group. *Am J Pathol.* 2009; 174: 550–564.
